# Supplementary material for: Expression of combinatorial immunoglobulins in macrophages in the tumor microenvironment
Source: PubMed Central journal article supplement (PMC6150476; doi:10.1371/journal.pone.0204108), 2018-09-21
Supplement: pone.0204108.s001.pdf [file pone.0204108.s001.pdf]

Figure S1

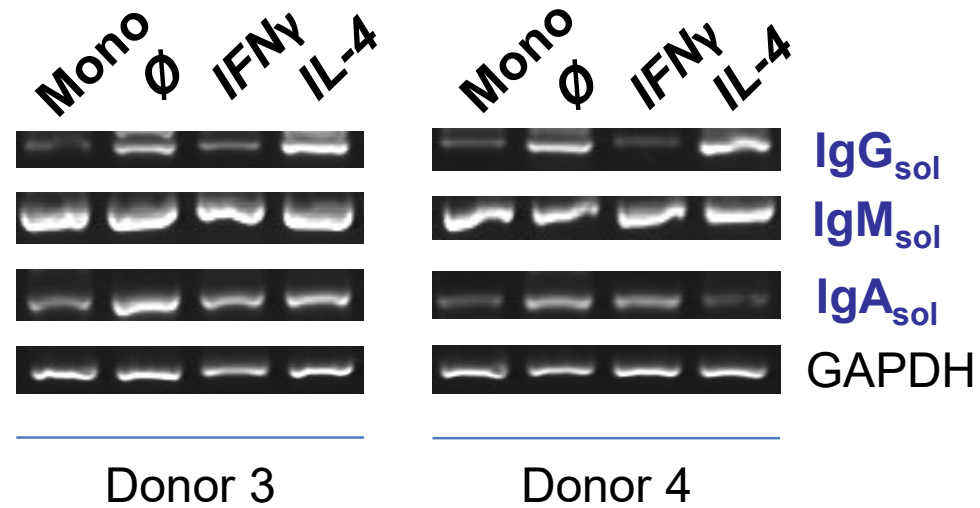

**Immunoglobulin heavy chain gene expression in monocytes and *in vitro* differentiated macrophages.** RT-PCR profiling for the immunoglobulin heavy chain genes (IgG, IgM, IgA) is shown for CD14<sup>+</sup> monocytes and *in vitro* differentiated macrophages (without any stimulus ( $\emptyset$ ), IFN $\gamma$  or IL-4, respectively from two representative healthy individuals (Donor 3 and 4). GAPDH is shown as a house-keeping control. IFN $\gamma$ : Interferon  $\gamma$ ; IL-4: Interleukin-4; GAPDH: Glycerinaldehyd-3-phosphat-dehydrogenase.
