# Supplementary material for: Expression of combinatorial immunoglobulins in macrophages in the tumor microenvironment
Source: PubMed Central journal article supplement (PMC6150476; doi:10.1371/journal.pone.0204108), 2018-09-21
Supplement: pone.0204108.s002.pdf [file pone.0204108.s002.pdf]

Figure S2

**IFN $\gamma$  CD14<sup>+</sup> macrophages**

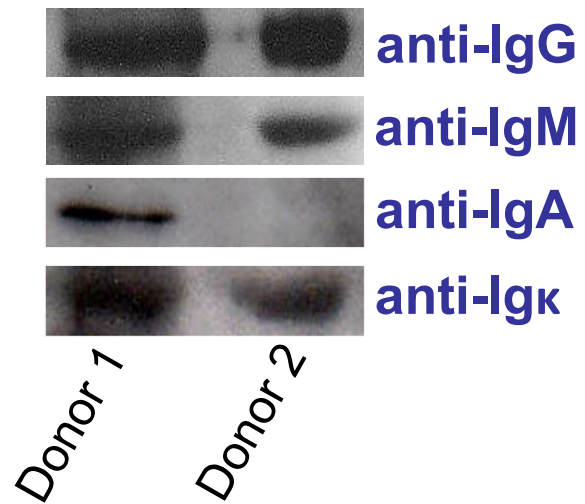

**Detection of immunoglobulins in macrophages by immunoblot.** Whole cell lysates of IFN $\gamma$ -activated CD14<sup>+</sup> macrophages from donors 1 and 2 were separated under reducing conditions. Antibodies against IgM, IgG, IgA and Ig $\kappa$ , respectively, were used.
