# Supplementary material for: Expression of combinatorial immunoglobulins in macrophages in the tumor microenvironment
Source: PubMed Central journal article supplement (PMC6150476; doi:10.1371/journal.pone.0204108), 2018-09-21
Supplement: pone.0204108.s003.pdf [file pone.0204108.s003.pdf]

Figure S3

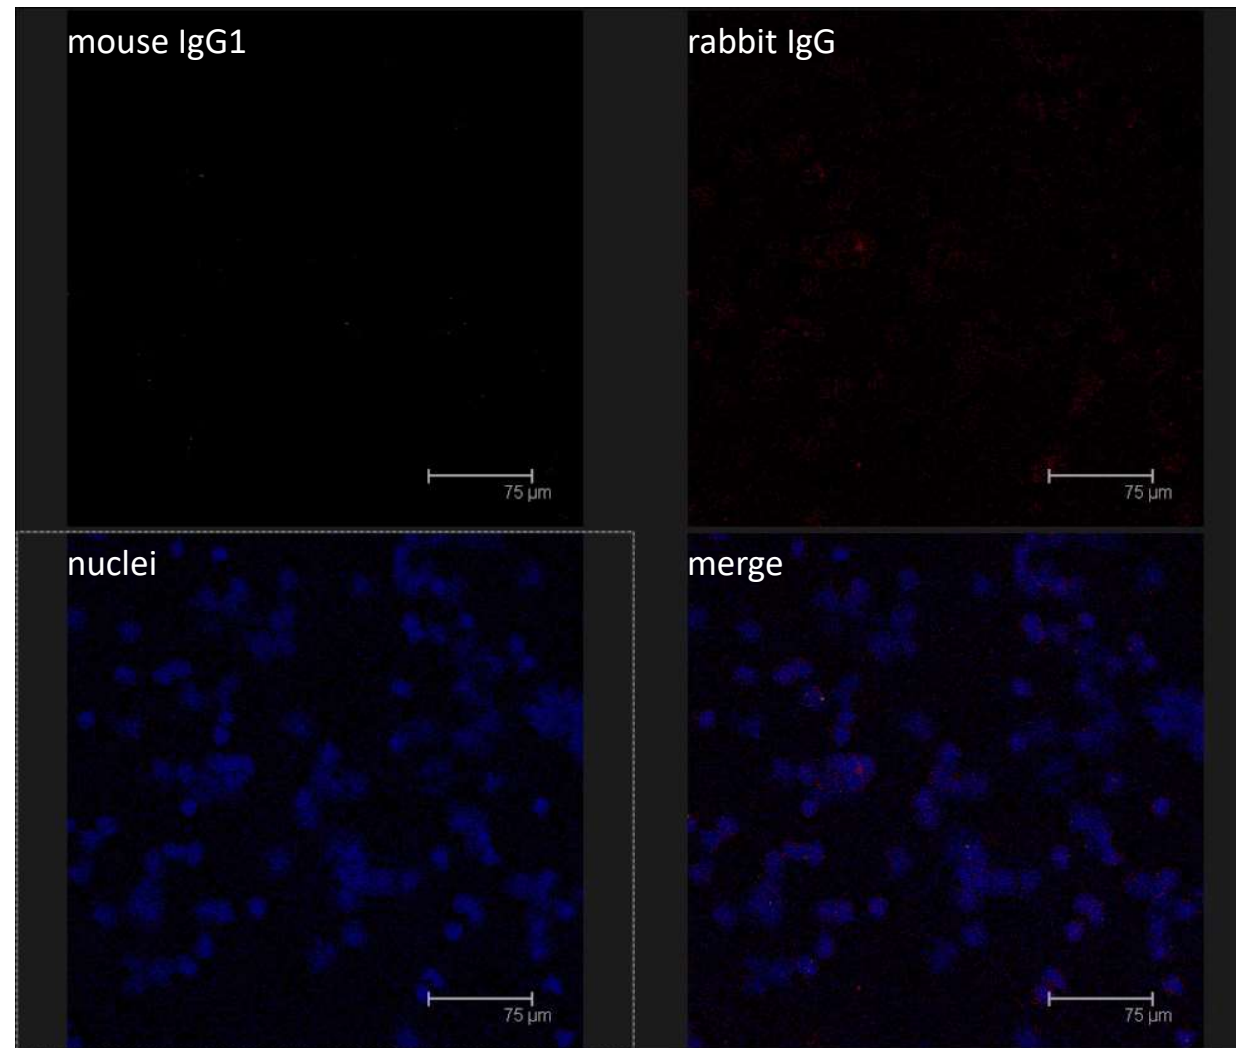

**Isotype control stainings of purified CD14<sup>+</sup> monocytes.** Note the absence of immunostaining, when isotype-matched control antibodies were used in place of the anti-TCR $\alpha\beta$  (mouse IgG1) and the anti-IgM (rabbit IgG) primary antibodies. Nuclei (blue) are counterstained with DRAQ5.
