# Supplementary material for: Expression of combinatorial immunoglobulins in macrophages in the tumor microenvironment
Source: PubMed Central journal article supplement (PMC6150476; doi:10.1371/journal.pone.0204108), 2018-09-21
Supplement: pone.0204108.s004.pdf [file pone.0204108.s004.pdf]

Figure S4

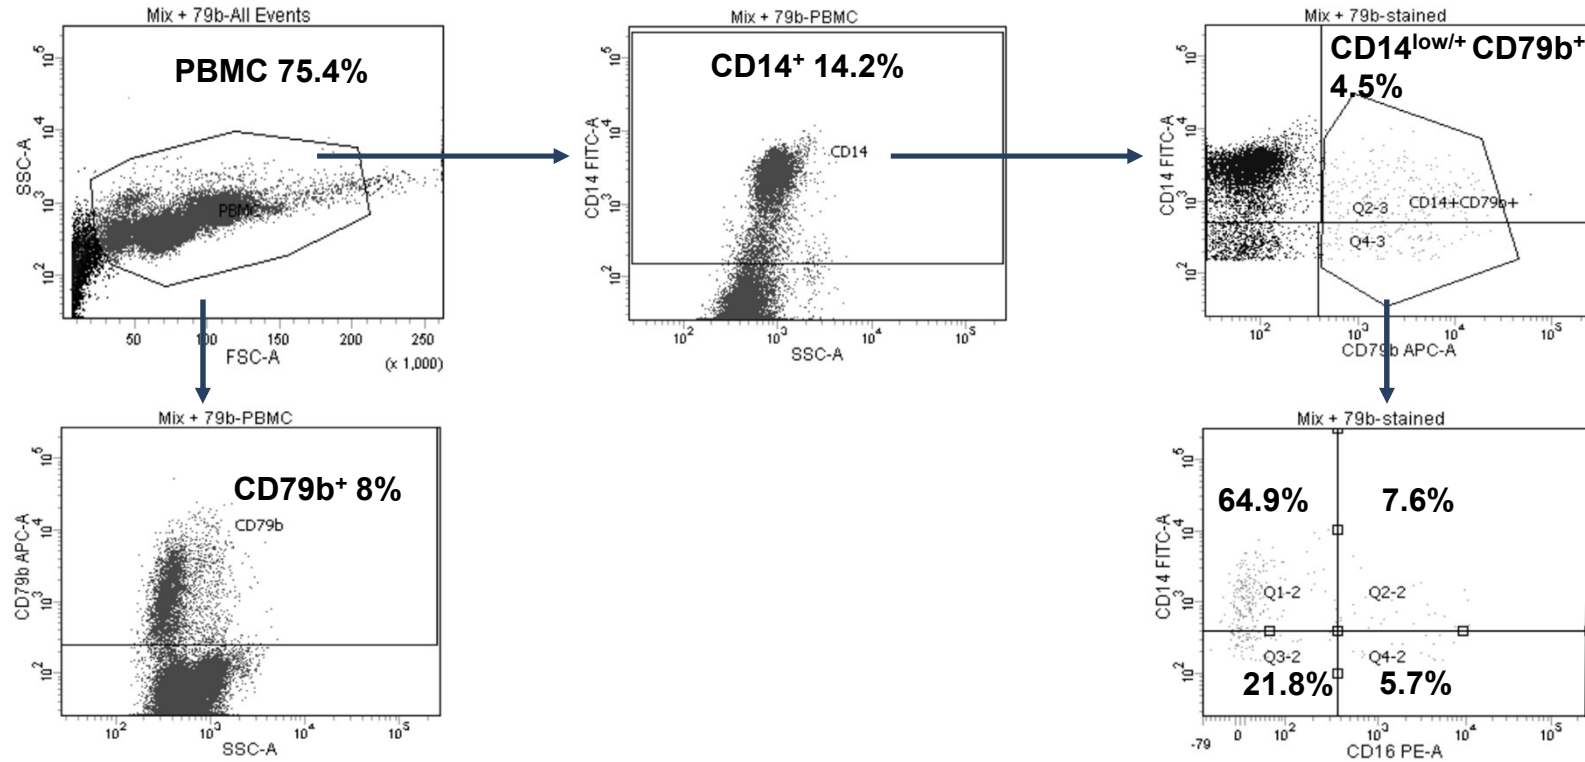

**Analysis of the CD79b expression in PBMC by flow cytometry.** Flow cytometry of freshly isolated PBMC representatively shown for one individual demonstrates the expression of CD79b in CD14<sup>+/low</sup> monocytes. Note the diverse distribution of the CD79b expression in the three monocyte subgroups CD14<sup>+</sup>/CD16<sup>-</sup> (classical monocytes; 64.9%); CD14<sup>+</sup>/CD16<sup>+</sup> (intermediate monocytes; 7.6%) and CD14<sup>low/+</sup>/CD16<sup>+</sup> (non-classical monocytes; 5.7%). Using this surrogate marker for immunoglobulin expression suggests the classical monocytes as the main immunoglobulin producing subgroup.
