# Supplementary material for: Expression of combinatorial immunoglobulins in macrophages in the tumor microenvironment
Source: PubMed Central journal article supplement (PMC6150476; doi:10.1371/journal.pone.0204108), 2018-09-21
Supplement: pone.0204108.s006.pdf [file pone.0204108.s006.pdf]

Figure S6

CD11b<sup>+</sup> bone marrow

IL-7R<sup>-/-</sup>

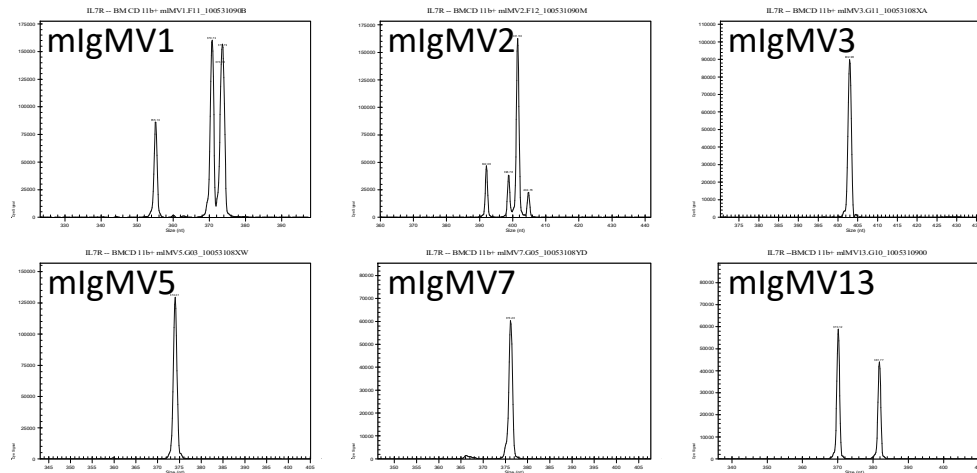

wt

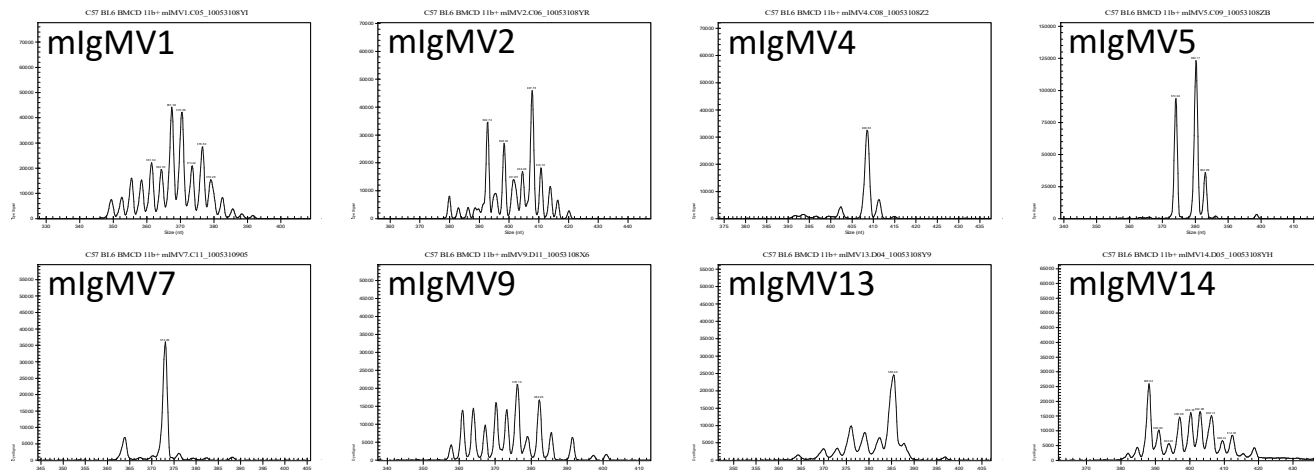

**Length variant analysis of the murine IgM V heavy chain antigen-binding CDR3 region.** Length variant analysis of the antigen-binding complementarity determining region 3 (CDR3) demonstrates the constitutive expression of mIgM variable heavy chain repertoires by bone marrow CD11b<sup>+</sup> macrophages from wildtype mice (wt) and mice lacking lymphocytes (IL-7 receptor knockout mice, IL-7R<sup>-/-</sup>). V<sub>H</sub> - C<sub>M</sub> specific cDNA segments were amplified by RT-PCR and separated by capillary electrophoresis (“CDR3 spectratyping”). The detailed CDR3 length spectratypes for each expressed V chain are shown. Peak heights are indicated as fluorescence units.
