# Supplementary material for: Expression of combinatorial immunoglobulins in macrophages in the tumor microenvironment
Source: PubMed Central journal article supplement (PMC6150476; doi:10.1371/journal.pone.0204108), 2018-09-21
Supplement: pone.0204108.s007.pdf [file pone.0204108.s007.pdf]

Figure S7A

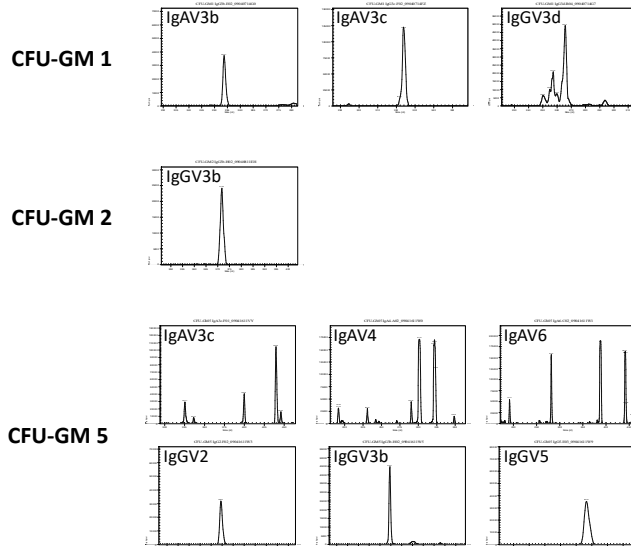

Figure S7B

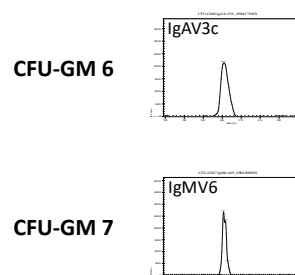

**Quantitative length variant analysis of the antigen-binding CDR3 region of granulocyte/ macrophage progenitor colonies (CFU-GM).** Length variant analysis of the antigen-binding complementarity determining region 3 (CDR3) shows the expression of IgM, IgG and IgA variable heavy chain repertoires, respectively, by seven granulocyte/ macrophage progenitor colonies obtained from CD34<sup>+</sup> progenitors of a healthy donor. V<sub>H</sub>-C<sub>M/G/A</sub> specific cDNA segments were amplified by RT-PCR and separated by capillary electrophoresis ("CDR3 spectratyping"). The detailed CDR3 length spectratypes for each expressed V chain are shown. Peak heights are indicated as fluorescence units.
