# Supplementary material for: Expression of combinatorial immunoglobulins in macrophages in the tumor microenvironment
Source: PubMed Central journal article supplement (PMC6150476; doi:10.1371/journal.pone.0204108), 2018-09-21
Supplement: pone.0204108.s008.pdf [file pone.0204108.s008.pdf]

Figure 8A

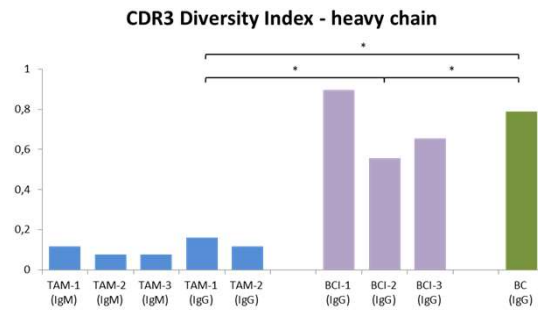

Figure 8B

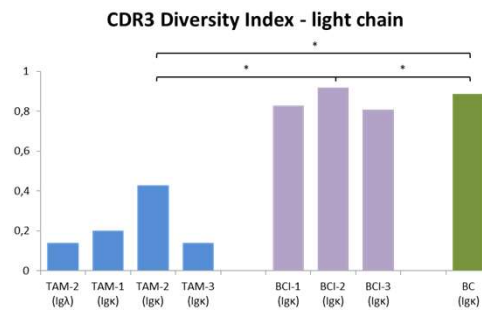

**CDR3 Diversity Index for immunoglobulin heavy (A) and light (B) chains.** CDR3 heavy (A) and light chain (B) repertoire diversity indices for immunoglobulins expressed by TAM obtained from three distinct cancer patients (TAM-1, TAM-2, TAM-3). Note that TAM express markedly less diverse repertoires relative to B cells from patients with inflammatory diseases (BCI-1, BCI-2, BCI-3) and normal B cells (BC). The diversity index indicates the ratio of distinct clonotypes to the total number of sequenced clones. \*= $p < 0.05$ .
