# Supplementary material for: Expression of combinatorial immunoglobulins in macrophages in the tumor microenvironment
Source: PubMed Central journal article supplement (PMC6150476; doi:10.1371/journal.pone.0204108), 2018-09-21
Supplement: pone.0204108.s009.pdf [file pone.0204108.s009.pdf]

Figure S9

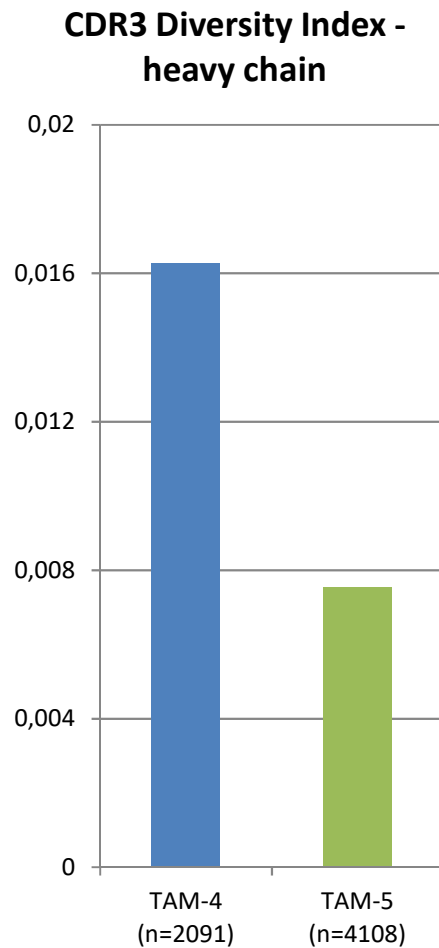

**Diversity Index for V<sub>H</sub> segments of NGS sequences.**

CDR3 heavy chain repertoire diversity indices for immunoglobulins expressed by NGS sequenced TAM obtained from two distinct cancer patients (TAM-4, TAM-5, TAM-3). The diversity index indicates the ratio of unique clonotypes to the total number of sequenced clones. The number of clones analyzed for each repertoire is shown below the columns.
