# Supplementary material for: Expression of combinatorial immunoglobulins in macrophages in the tumor microenvironment
Source: PubMed Central journal article supplement (PMC6150476; doi:10.1371/journal.pone.0204108), 2018-09-21
Supplement: pone.0204108.s010.pdf [file pone.0204108.s010.pdf]

Figure S10

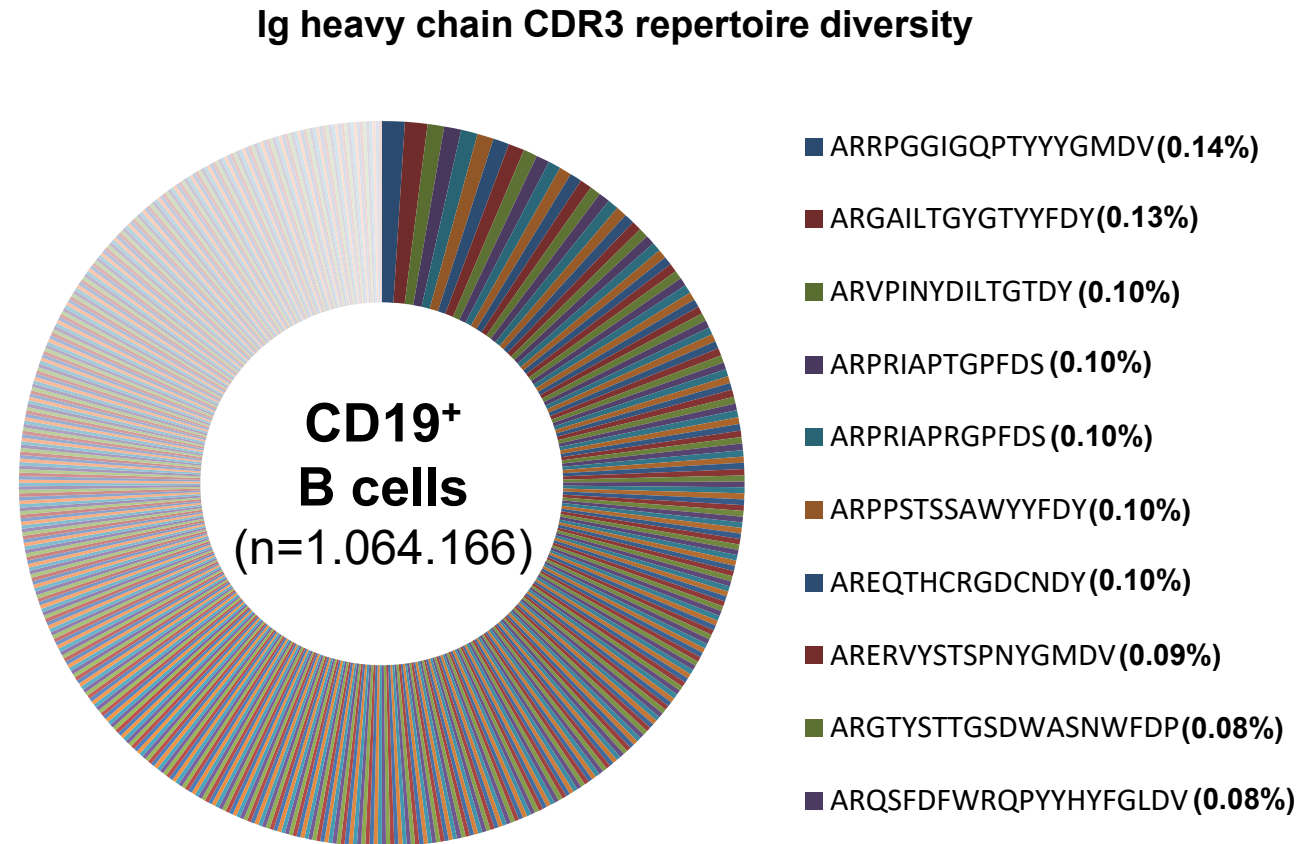

**B cell Ig heavy chain repertoire transcriptome profile assessed by ultra-deep sequencing.**

Shown is the Ig V<sub>H</sub> CDR3 repertoires of CD19<sup>+</sup> B cells isolated from a healthy individual as assessed by ultra-deep sequencing. The circle graph visualizes the relative abundance of the expressed Ig heavy chain CDR3 transcript variants. Each sector in a circle represents a rearranged Ig heavy chain transcript that encodes a unique CDR3 sequence. It is defined by a unique color and its area is proportional to the relative transcript frequency. The total numbers of identified Ig V<sub>H</sub> CDR3 variants are indicated in the center. The 10 most frequently expressed Ig heavy chain CDR3 variants are shown in detail and the respective percentages are shown in parentheses.
