# Supplementary material for: Expression of combinatorial immunoglobulins in macrophages in the tumor microenvironment
Source: PubMed Central journal article supplement (PMC6150476; doi:10.1371/journal.pone.0204108), 2018-09-21

Figure S11A

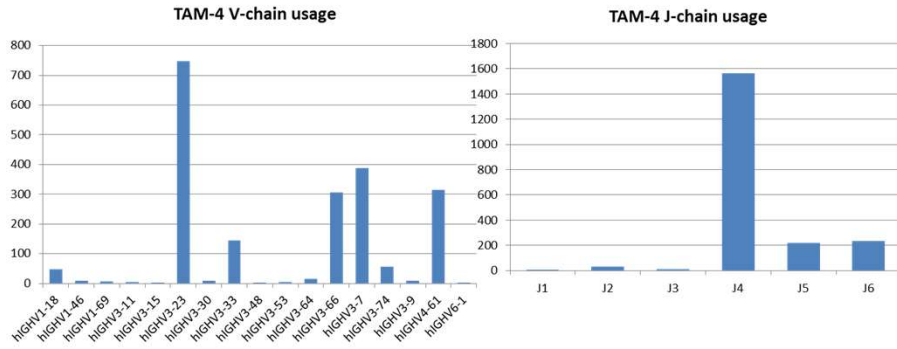

**Immunoglobulin V/J gene usage.** IgHV and IgHJ gene usage by TAM-4 (A) and TAM-5 (B), respectively. The 2D-plots show the relative usage of the IgHV, (left) and IgHJ, (right) genes by TAM from each individual. X-axis: IgHV gene/IgHJ gene. Y-axis: number of used IgHV/IgHJ genes

Figure S11B

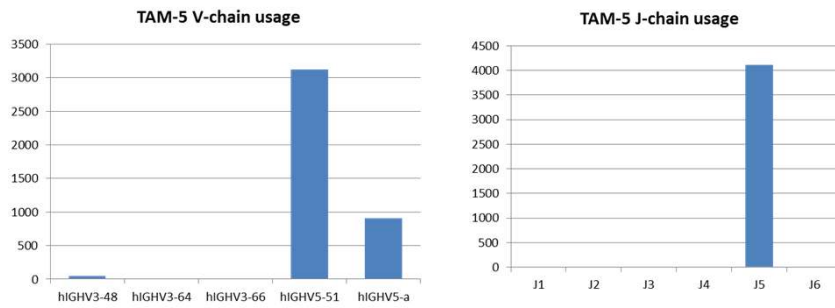

Supplement: pone.0204108.s011.pdf [file pone.0204108.s011.pdf]
