# Supplementary material for: Expression of combinatorial immunoglobulins in macrophages in the tumor microenvironment
Source: PubMed Central journal article supplement (PMC6150476; doi:10.1371/journal.pone.0204108), 2018-09-21
Supplement: pone.0204108.s012.pdf [file pone.0204108.s012.pdf]

Table S1: List of CDR3 protein sequences and their expression frequencies in the analyzed cell samples

|       | IgM (n=34)                   | IgG (n=37)                    | Igk (n=15)            |                     |
|-------|------------------------------|-------------------------------|-----------------------|---------------------|
| TAM-1 | ARIPAYCASTSCYEDGWGY 26 (76%) | ARGRGLRFLWFIDY 18 (49%)       | QQYYPYSGS 7 (47%)     |                     |
|       | ARPMVARGARDAFDI 5 (15%)      | ARIPGSYFTGRYYFDY 7 (19%)      | QQYDSSIT 6 (40%)      |                     |
|       | ASRIIGTINC 2 (6%)            | ARGPSVSGYSYFFKGMVDV 6 (16%)   | LQYYSYPWT 2 (13%)     |                     |
|       | ARIPGSYFTGRYYFDY 1 (3%)      | AKELSVAAATDALDI 3 (8%)        |                       |                     |
|       | ARGPSVSGYSFFYKGMVDV 2 (5%)   |                               |                       |                     |
|       | ARGSGGLTITFGGVIPYFDY 1 (3%)  |                               |                       |                     |
|       | IgM (n=39)                   | IgG (n=34)                    | Igk (n=28)            | Igλ (n=36)          |
| TAM-2 | ARVPINVDILTGTDY 37 (95%)     | ARGSRIEVDLWNPQEAAFDI 20 (59%) | QQYDNLPLYT 5 (18%)    | LLTYGGARV 28 (78%)  |
|       | ARVPINVDILTGTDC 1 (3%)       | ASAGMNYYYGMVDV 10 (29%)       | QQYDNLISALT 5 (18%)   | QVWDTSSDHRV 5 (14%) |
|       | ARVPINVDILTGTDY 1 (3%)       | AREHSRGLSFDY 2 (6%)           | QHYYGSPGGTMYT 3 (11%) | LLAYGGARV 1 (3%)    |
|       |                              | AKARREYYGVGNVFFPE 2 (6%)      | QQYSSSWWT 3 (11%)     | QAWDSSTVV 1 (3%)    |
|       |                              |                               | QQYNSYLYT 3 (11%)     | QVWDSDDHVV 1 (3%)   |
|       |                              |                               | QQYKWPPLT 2 (7%)      |                     |
|       |                              |                               | QQYNSYPLT 2 (7%)      |                     |
|       |                              |                               | HHYGTSPYT 1 (4%)      |                     |
|       |                              |                               | MQALQTPA 1 (4%)       |                     |
|       |                              |                               | QQYESFPPT 1 (4%)      |                     |
|       |                              |                               | QQYNSYSLT 1 (4%)      |                     |
|       |                              |                               | QQYNSYSYT 1 (4%)      |                     |
|       |                              | IgM (n=51)                    |                       | Igk (n=36)          |
| TAM-3 | ARVPINVDILTGTDY 37 (73%)     |                               | QQYNTYPLT 19 (53%)    |                     |
|       | ARGYYGMVDV 12 (24%)          |                               | QQYDNLPLYT 10 (28%)   |                     |
|       | ARVPINVDILTGTDY 1 (2%)       |                               | QQYDNLISALT 6 (17%)   |                     |
|       | AGVPINVDILTGTDY 1 (2%)       |                               | QQSYSTPRT 1 (3%)      |                     |
|       |                              | IgG (n=39)                    | Igk (n=35)            |                     |
| BCI-1 |                              | ARDPYYYGSSSTFDP 2 (5%)        | KQYNAYPIT 2 (6%)      |                     |
|       |                              | AREALPYDFWGDHYPRDSVEV 2 (5%)  | QQSYSTPRT 2 (6%)      |                     |
|       |                              | ARGRCGGDCRLRYYFDY 2 (5%)      | QQSYSTPYT 2 (6%)      |                     |
|       |                              | ARVIAIVTSTGLDY 2 (5%)         | QQSYSTSLT 2 (6%)      |                     |
|       |                              | AALKVGGTRSFYD 1 (3%)          | QQYDNLPRY 2 (6%)      |                     |
|       |                              | AGVRGDSFILFVF 1 (3%)          | QQYGNISPLT 2 (6%)     |                     |
|       |                              | AKDLGHLVVVITASKIDR 1 (3%)     | LQDYNYPRT 1 (3%)      |                     |
|       |                              | AKDTAISGGEYGMVDV 1 (3%)       | LQHDNPFPLT 1 (3%)     |                     |
|       |                              | AKHTRGSVFLGTLDI 1 (3%)        | LQHDNFPWT 1 (3%)      |                     |
|       |                              | AKLTDY 1 (3%)                 | QQSYSTLT 1 (3%)       |                     |
|       |                              | AKLVSN 1 (3%)                 | QQSYSTPRAT 1 (3%)     |                     |
|       |                              | ARDFLYDFSAFMPKAFDS 1 (3%)     | QQSYSTPWT 1 (3%)      |                     |
|       |                              | ARDKGTSGGAFDI 1 (3%)          | QQSYSTRWT 1 (3%)      |                     |
|       |                              | ARDNFAGGFEGDYYYGLDV 1 (3%)    | QQSYSTSWT 1 (3%)      |                     |
|       |                              | AREALPYDFWGDYPRDSVEV 1 (3%)   | QQYTSFPHT 1 (3%)      |                     |
|       |                              | AREGVNLLS SDGAGARHYLDY 1 (3%) | QQYDNLIT 1 (3%)       |                     |
|       |                              | AREKPHLYFDY 1 (3%)            | QQYDNLPGT 1 (3%)      |                     |
|       |                              | AREYIWRFLRWFD 1 (3%)          | QQYDNLPLYT 1 (3%)     |                     |
|       |                              | ARGKSEYRDAFDM 1 (3%)          | QQYDNLPPR 1 (3%)      |                     |
|       |                              | ARGTRNNWIPGFDH 1 (3%)         | QQYDNLSSLT 1 (3%)     |                     |
|       |                              | ARGTRNNWISVGFDL 1 (3%)        | QQYSSSPWT 1 (3%)      |                     |
|       |                              | ARHAGTYFDY 1 (3%)             | QQYSSSELT 1 (3%)      |                     |
|       |                              | ARLYPRPGITETRRFDP 1 (3%)      | QQYGTSPPT 1 (3%)      |                     |
|       |                              | ARNLYGTGTFED 1 (3%)           | QQYNSYSGT 1 (3%)      |                     |
|       |                              | ARVLSIRTQCVSGPCNAWFDP 1 (3%)  | QQYNSYSPYT 1 (3%)     |                     |
|       |                              | ARVSPMTVTTFDY 1 (3%)          | QQYNTYPLT 1 (3%)      |                     |
|       |                              | ASGYPWGNCPEKSEDY 1 (3%)       | QQYYSTPLT 1 (3%)      |                     |
|       |                              | GRHAGPTYFDY 1 (3%)            | QQYYSTYT 1 (3%)       |                     |
|       |                              | IKGGSRSGWYCGGDF 1 (3%)        | QQYYSYPLT 1 (3%)      |                     |
|       |                              | SVINPGGAIV 1 (3%)             |                       |                     |
|       |                              | VKDKSRGTYADAFDI 1 (3%)        |                       |                     |
|       |                              | VRGCTGDCVSGTDYYYGLDV 1 (3%)   |                       |                     |
|       |                              | VRVGRGPDYVWVFGY 1 (3%)        |                       |                     |
|       | VRTGGCRDGATAICLQH 1 (3%)     |                               |                       |                     |
|       | VTTSSPWLVDWKGTPVTVSS 1 (3%)  |                               |                       |                     |
|       |                              | IgG (n=18)                    | Igk (n=25)            |                     |
| BCI-2 |                              | ARQPSIVRLSNLYYMDV 5 (28%)     | QEYNSAPWT 2 (8%)      |                     |
|       |                              | ARGQSSYYGHFDY 3 (17%)         | QQYSVNSA 2 (8%)       |                     |
|       |                              | ARHSSKGVVPSRPRWFLDL 2 (11%)   | LQDYTYPLT 1 (4%)      |                     |
|       |                              | ARQAGSSPLEH 2 (11%)           | LQYERYWT 1 (4%)       |                     |
|       |                              | AKGGYYHGGYWFDP 1 (6%)         | QHYNLPPY 1 (4%)       |                     |
|       |                              | ARHGLAVAGTRWFDP 1 (6%)        | QHYNGYPYT 1 (4%)      |                     |
|       |                              | ARTYSSGWYVFDY 1 (6%)          | QKYNVPT 1 (4%)        |                     |
|       |                              | TRRSRELWPPP 1 (6%)            | QQANSFPLT 1 (4%)      |                     |
|       |                              | TTELWLVPPEMLY 1 (6%)          | QQNYRILT 1 (4%)       |                     |
|       |                              | VALRYCSGSGCNWFDP 1 (6%)       | QQSYSDPLT 1 (4%)      |                     |
|       |                              |                               | QQSYSSRT 1 (4%)       |                     |
|       |                              |                               | QQSYSTPLT 1 (4%)      |                     |
|       |                              |                               | QQTYSTPWT 1 (4%)      |                     |
|       |                              |                               | QQYDHPVA 1 (4%)       |                     |
|       |                              |                               | QQYSSPPLT 1 (4%)      |                     |
|       |                              | QQYSSPPS 1 (4%)               |                       |                     |
|       |                              | QQYSSPRT 1 (4%)               |                       |                     |
|       |                              | QQYKSDYPVT 1 (4%)             |                       |                     |
|       |                              | QQYNSYPWT 1 (4%)              |                       |                     |
|       |                              | QQYNSYPYT 1 (4%)              |                       |                     |
|       |                              | QQYSRYSRK 1 (4%)              |                       |                     |
|       |                              | QQYSSSLWT 1 (4%)              |                       |                     |
|       |                              | QRYDNFPPT 1 (4%)              |                       |                     |
|       |                              | IgG (n=32)                    | Igk (n=26)            |                     |
|       |                              | ARDGAVGRRGGYLDY 5 (16%)       | QQSYSTPYT 3 (12%)     |                     |
|       |                              | ARAVNGVFDY 3 (9%)             | QQRSNWPLT 2 (8%)      |                     |
|       |                              | VKAGLWGAQQYYAMDV 3 (9%)       | QQSYSTLLT 2 (8%)      |                     |
|       |                              | AKDDVGVGNWFTP 2 (6%)          | QQYDNLQIT 2 (8%)      |                     |
|       |                              | ARDRESSAWWEHENDAFDV 2 (6%)    | HQTYRIPFT 1 (4%)      |                     |

|                   |                       |            |                   |        |
|-------------------|-----------------------|------------|-------------------|--------|
| BCI-3             | ARKYDYHGISGYYFDY      | 2 (6%)     | LEDYDYPWT         | 1 (4%) |
|                   | AGGRGYTYGYAY          | 1 (3%)     | MQGTYWPPWT        | 1 (4%) |
|                   | AKEGGSRGFRPPGALYY     | 1 (3%)     | QHYGDSPPIT        | 1 (4%) |
|                   | AKLRDGYNCSDY          | 1 (3%)     | QYNSAPWT          | 1 (4%) |
|                   | AKVSYNSGYYYGMDV       | 1 (3%)     | QQFNSYPLT         | 1 (4%) |
|                   | ARAYCGDDCPVGYYYGMDV   | 1 (3%)     | QQFNSYPSLT        | 1 (4%) |
|                   | ARDYGSYPDY            | 1 (3%)     | QQSYNIPRT         | 1 (4%) |
|                   | AREVINSWYHYFDS        | 1 (3%)     | QQSYSTPLT         | 1 (4%) |
|                   | ARGFDGKVGGH           | 1 (3%)     | QQSYSTPPVT        | 1 (4%) |
|                   | ARGFGNDTFMVGFDA       | 1 (3%)     | QQSYSTPT          | 1 (4%) |
|                   | ARGGNWKGDDY           | 1 (3%)     | QQSYSVPLT         | 1 (4%) |
|                   | ARGNRGEQFDSGGYCFWFDP  | 1 (3%)     | QQYSSPLQGLT       | 1 (4%) |
|                   | ARGTQGNFVGGDC         | 1 (3%)     | QQYSGYWT          | 1 (4%) |
|                   | ARSLDVGASMPFDY        | 1 (3%)     | QQYYSTPLT         | 1 (4%) |
| GRGPYYDSGTYNAYIDN | 1 (3%)                | QQYYSTPRT  | 1 (4%)            |        |
| TTDGALRPYQFVY     | 1 (3%)                | QQYYSPSTWT | 1 (4%)            |        |
|                   | <b>IgG (n=33)</b>     |            | <b>Igk (n=35)</b> |        |
| BC                | ARILRVAGFDY           | 4 (12%)    | QQYNNWPPWT        | 2 (6%) |
|                   | ARMGGYAGENAFDV        | 2 (6%)     | QQYNNWPTWT        | 2 (6%) |
|                   | AHSGWSTSVLEY          | 2 (6%)     | QQYNNWPPYT        | 2 (6%) |
|                   | ARMVGSYGQGWLALYDS     | 2 (6%)     | QQYYSYPT          | 2 (6%) |
|                   | ARFPMFRGVDY           | 2 (6%)     | LQHNSYPYT         | 1 (3%) |
|                   | AHRGVGGRHCC           | 1 (3%)     | MQGTHWPPWT        | 1 (3%) |
|                   | AQAWGIGGSGTSLDL       | 1 (3%)     | MQTTRDVS          | 1 (3%) |
|                   | AHIKSLFTGSAGDYGMDV    | 1 (3%)     | QHLNSYPR          | 1 (3%) |
|                   | ARIVNFHWFLNYFDY       | 1 (3%)     | QYNNWPRGT         | 1 (3%) |
|                   | ARITGTTGYFDY          | 1 (3%)     | QLFGTSQYT         | 1 (3%) |
|                   | ARMRPFSGNIGTYHLDC     | 1 (3%)     | QQFNSYPLT         | 1 (3%) |
|                   | ARSGWSSVLED           | 1 (3%)     | QQFYSLPLT         | 1 (3%) |
|                   | ARTLRREIGSYPFDF       | 1 (3%)     | QQYDNLIMYT        | 1 (3%) |
|                   | ARSPGDDYGDYFFDY       | 1 (3%)     | QQYHKWPPVT        | 1 (3%) |
|                   | AKALGRSGYGRFDY        | 1 (3%)     | QQYNNWPPWFT       | 1 (3%) |
|                   | AREAGSDGRAFDI         | 1 (3%)     | QQYNNWPPYT        | 1 (3%) |
|                   | AKYGEFMIVVPHFDY       | 1 (3%)     | QQYNNWPQT         | 1 (3%) |
|                   | AKGTTNIDY             | 1 (3%)     | QQYNNWPRT         | 1 (3%) |
|                   | AKDVRGGTDLDPDY        | 1 (3%)     | QQYNNWPSGT        | 1 (3%) |
|                   | AKDIWRWAFDY           | 1 (3%)     | QQYNSY            | 1 (3%) |
|                   | ARDSYSSGWYFDY         | 1 (3%)     | QQYNSYPWT         | 1 (3%) |
|                   | AKGESGMDV             | 1 (3%)     | QQYNSYSYT         | 1 (3%) |
|                   | ARIPGSYFTGRYFDY       | 1 (3%)     | QQYNTYWT          | 1 (3%) |
|                   | ARDFGSYHRPIHWFDDL     | 1 (3%)     | QQYQLPLT          | 1 (3%) |
|                   | ARQDYGDYRLGY          | 1 (3%)     | QQYSSFPWT         | 1 (3%) |
|                   | ARVAVGRFLEWDHPRAWYFDL | 1 (3%)     | QQYTADSSWT        | 1 (3%) |
|                   |                       |            | QQYYSTPRT         | 1 (3%) |
|                   |                       |            | QQYYSTPWT         | 1 (3%) |
|                   |                       | QQYYTPLT   | 1 (3%)            |        |
|                   |                       | QQYNNWPPLT | 1 (3%)            |        |
|                   |                       | QQYDNLFT   | 1 (3%)            |        |
