# Supplementary material for: Expression of combinatorial immunoglobulins in macrophages in the tumor microenvironment
Source: PubMed Central journal article supplement (PMC6150476; doi:10.1371/journal.pone.0204108), 2018-09-21
Supplement: pone.0204108.s013.pdf [file pone.0204108.s013.pdf]

**Table S2: Shared IgG, IgM and Igk CDR3 protein sequences among different cell fractions**

|                  | TAM-1 |     | TAM-2 | TAM-3 | BC  |
|------------------|-------|-----|-------|-------|-----|
|                  | IgM   | IgG | IgM   | IgM   | IgG |
| ARVPINYGILTGTDY  |       |     | 37    | 37    |     |
| ARIPGSYFTGRYYFDY | 1     | 7   |       |       | 1   |

|            | TAM-2 | TAM-3 | BCI-1 | BCI-2 | BCI-3 | BC |
|------------|-------|-------|-------|-------|-------|----|
|            | Igk   |       |       |       |       |    |
| QQYDNLPLYT | 5     | 10    |       |       |       |    |
| QQYDNLALT  | 5     | 6     |       |       |       |    |
| QQYNSYSYT  | 1     |       |       |       |       | 1  |
| QQYNTYPLT  |       | 19    | 1     |       |       |    |
| QQSYSTPRT  |       | 1     | 2     |       |       |    |
| QQYNSYPWT  |       |       |       | 1     |       | 1  |
| QQSYSTPYT  |       |       | 2     |       | 3     |    |
| QQYYSTPLT  |       |       | 1     |       | 1     |    |
| QQSYSTPLT  |       |       |       | 1     | 1     |    |

Several CDR3s were found to be shared among repertoires. Two Ig heavy chain CDR3s occurred in more than one repertoire. Several CDR3s were shared among the Igk light chain repertoires.
