# Supplementary material for: Expression of combinatorial immunoglobulins in macrophages in the tumor microenvironment
Source: PubMed Central journal article supplement (PMC6150476; doi:10.1371/journal.pone.0204108), 2018-09-21
Supplement: pone.0204108.s014.pdf [file pone.0204108.s014.pdf]

Table S3: List of all V(D)J combinations found in the sanger-sequenced cell fractions.

|  | IgM (n=34)      |                | IgG (n=37)         |                | Igκ (n=15) |           |            |           |
|--|-----------------|----------------|--------------------|----------------|------------|-----------|------------|-----------|
|  | TAM-1           | VH2-70/D2-2/J4 | 26 (76%)           | VH4-31/D3-3/J4 | 18 (49%)   | VK1-5/J4  | 9 (60%)    |           |
|  | VH5-51/D3-10/J3 | 5 (15%)        | VH4-31/D3-3/J6     | 8 (22%)        | VK3-20/J4  | 4 (27%)   |            |           |
|  | VH3-23/D1-14/J4 | 2 (6%)         | VH4-4/D1-26/J4     | 7 (19%)        | VK1-16/J1  | 2 (13%)   |            |           |
|  | VH4-4/D1-26/J4  | 1 (3%)         | VH4-4/D2-15 inv/J3 | 3 (8%)         |            |           |            |           |
|  |                 |                | VH4-31/D3-16/J4    | 1 (3%)         |            |           |            |           |
|  | IgM (n=39)      |                | IgG (n=34)         |                | Igκ (n=28) |           | Igλ (n=36) |           |
|  | TAM-2           | VH3-21/D3-9/J4 | 39 (100%)          | VH4-61/D2-2/J3 | 20 (59%)   | VK1-33/J4 | 6 (21%)    | VL7-46/J3 |
|  |                 |                | VH1-18/D3-3/J6     | 10 (29%)       | VK1-5/J2   | 6 (21%)   | VL3-21/J3  | 5 (14%)   |
|  |                 |                | VH1-69/D3-10/J4    | 2 (6%)         | VK1-33/J2  | 5 (18%)   | VL3-1/J3   | 2 (6%)    |
|  |                 |                | VH3-30/D3-10/J4    | 2 (6%)         | VK3-20/J2  | 4 (14%)   |            |           |
|  |                 |                |                    |                | VK3-20/J1  | 3 (11%)   |            |           |
|  |                 |                |                    |                | VK3-15/J4  | 2 (7%)    |            |           |
|  |                 |                |                    |                | VK1-5/J3   | 1 (4%)    |            |           |
|  |                 |                |                    |                | VK2-28/J5  | 1 (4%)    |            |           |
|  | IgM (n=50)      |                |                    |                | Igκ (n=36) |           |            |           |
|  | TAM-3           | VH3-21/D3-9/J4 | 39 (78%)           |                | VK1-5/J4   | 19 (53%)  |            |           |
|  |                 | VH3-74/-/J6    | 11 (22%)           |                | VK1-33/J4  | 6 (17%)   |            |           |
|  |                 |                |                    |                | VK1-33/J2  | 5 (14%)   |            |           |
|  |                 |                |                    |                | VK1-5/J2   | 5 (14%)   |            |           |
|  |                 |                |                    |                | VK1-39/J2  | 1 (3%)    |            |           |
|  |                 |                | IgG (n=39)         |                | Igκ (n=35) |           |            |           |
|  | BCI-1           |                | VH1-69/D3-3/J3     | 3 (8%)         | VK3-20/J4  | 5 (14%)   |            |           |
|  |                 |                | VH1-18/D4-11/J4    | 2 (5%)         | VK1-39/J1  | 4 (11%)   |            |           |
|  |                 |                | VH7-4-1/D5-24/J4   | 2 (5%)         | VK1-33/J2  | 3 (9%)    |            |           |
|  |                 |                | VH1-8/D2-21/J4     | 2 (5%)         | VK1-39/J2  | 3 (9%)    |            |           |
|  |                 |                | VH7-4-1/D3-22/J5   | 2 (5%)         | VK1-39/J4  | 3 (9%)    |            |           |
|  |                 |                | VH5-51/D1-26/J4    | 2 (5%)         | VK1-5/J1   | 2 (6%)    |            |           |
|  |                 |                | VH1-2/D2-21/J4     | 1 (3%)         | VK1-33/J4  | 2 (6%)    |            |           |
|  |                 |                | VH1-69/D6-19/J5    | 1 (3%)         | VK4-1/J4   | 2 (6%)    |            |           |
|  |                 |                | VH3-11/D3-9/J4     | 1 (3%)         | VK1-5/J4   | 1 (3%)    |            |           |
|  |                 |                | VH3-21/D2-21/J6    | 1 (3%)         | VK1-8/J4   | 1 (3%)    |            |           |
|  |                 |                | VH3-30/D6-19/J3    | 1 (3%)         | VK1-9/J2   | 1 (3%)    |            |           |
|  |                 |                | VH3-30/D3-22/J4    | 1 (3%)         | VK1-12/J3  | 1 (3%)    |            |           |
|  |                 |                | VH3-30/D2-21/J6    | 1 (3%)         | VK1-33/J1  | 1 (3%)    |            |           |
|  |                 |                | VH3-30/D5-12/J4    | 1 (3%)         | VK3-11/J2  | 1 (3%)    |            |           |
|  |                 |                | VH4-61/D3-10/J3    | 1 (3%)         | VK3-20/J1  | 1 (3%)    |            |           |
|  |                 |                | VH7-4-1/D1-7/J5    | 1 (3%)         | VK3-20/J5  | 1 (3%)    |            |           |
|  |                 |                | VH1-2/D2-8/J4      | 1 (3%)         | VK4-1/J2   | 1 (3%)    |            |           |
|  |                 |                | VH1-8/D3-10/J4     | 1 (3%)         | VK5-2/J1   | 1 (3%)    |            |           |
|  |                 |                | VH1-46/D5-24/J4    | 1 (3%)         | VK5-2/J2   | 1 (3%)    |            |           |
|  |                 |                | VH3-7/D3-10/J4     | 1 (3%)         |            |           |            |           |
|  |                 |                | VH3-9/D2-2/J6      | 1 (3%)         |            |           |            |           |
|  |                 |                | VH3-21/D3-9/J4     | 1 (3%)         |            |           |            |           |
|  |                 |                | VH3-23/D3-16/J3    | 1 (3%)         |            |           |            |           |
|  |                 |                | VH3-23/D5-24/J4    | 1 (3%)         |            |           |            |           |
|  |                 |                | VH3-30/D6-19/J4    | 1 (3%)         |            |           |            |           |
|  |                 |                | VH3-30/D2-21/J4    | 1 (3%)         |            |           |            |           |
|  |                 |                | VH3-33/D5-12/J3    | 1 (3%)         |            |           |            |           |
|  |                 |                | VH3-74/D6-19/J1    | 1 (3%)         |            |           |            |           |
|  |                 |                | VH3-74/D4-23/J4    | 1 (3%)         |            |           |            |           |
|  |                 |                | VH4-59/D4-17/J4    | 1 (3%)         |            |           |            |           |
|  |                 |                | VH5-51/D1-7/J5     | 1 (3%)         |            |           |            |           |
|  |                 |                | VH3-23/D2-21/J6    | 1 (3%)         |            |           |            |           |
|  |                 |                | IgG (n=18)         |                | Igκ (n=25) |           |            |           |
|  | BCI-2           |                | VH4-39/D1-26/J6    | 5 (28%)        | VK1-5/J1   | 4 (16%)   |            |           |
|  |                 |                | VH4-31/D6-13/J4    | 3 (17%)        | VK1-39/J1  | 3 (12%)   |            |           |
|  |                 |                | VH4-39/D2-15/J2    | 2 (11%)        | VK1-5/J2   | 2 (8%)    |            |           |
|  |                 |                | VH4-39/D6-6/J5     | 2 (11%)        | VK1-39/J4  | 2 (8%)    |            |           |
|  |                 |                | VH1-8/D2-15/J5     | 1 (6%)         | VK3-20/J4  | 2 (8%)    |            |           |
|  |                 |                | VH1-18/D1-20/J5    | 1 (6%)         | VK4-1/J1   | 2 (8%)    |            |           |
|  |                 |                | VH3-15/D6-19/J4    | 1 (6%)         | VK1-6/J4   | 1 (4%)    |            |           |
|  |                 |                | VH4-31/D3-22/J5    | 1 (6%)         | VK1-9/J4   | 1 (4%)    |            |           |

|       |                 |                      |         |                   |         |
|-------|-----------------|----------------------|---------|-------------------|---------|
|       |                 | VH4-39/D5-24/J5      | 1 (6%)  | VK1-12/J4         | 1 (4%)  |
|       |                 | VH4-61/D6-19/J4      | 1 (6%)  | VK1-16/J1         | 1 (4%)  |
|       |                 |                      |         | VK1-33/J3         | 1 (4%)  |
|       |                 |                      |         | VK1-33/J4         | 1 (4%)  |
|       |                 |                      |         | VK1-39/J2         | 1 (4%)  |
|       |                 |                      |         | VK1-39/J5         | 1 (4%)  |
|       |                 |                      |         | VK3-20/J1         | 1 (4%)  |
|       |                 |                      |         | VK3-20/J2         | 1 (4%)  |
|       |                 | <b>IgG (n=32)</b>    |         | <b>Igκ (n=26)</b> |         |
| BCI-3 |                 | VH3-33/D2-15/J4      | 4 (13%) | VK1-5/J4          | 3 (12%) |
|       |                 | VH3-9/D7-27/J6       | 3 (9%)  | VK1-39/J2         | 3 (12%) |
|       |                 | VH4-31/D4-17/J4      | 3 (9%)  | VK1-39/J4         | 3 (12%) |
|       |                 | VH4-31/D6-19/J3      | 2 (6%)  | VK1D-13/J4        | 2 (8%)  |
|       |                 | VH3-11/D3-16/J5      | 2 (6%)  | VK1-33/J5         | 2 (8%)  |
|       |                 | VH4-59/D2-2/J4       | 2 (6%)  | VK1D-43/J1        | 1 (4%)  |
|       |                 | VH3-11/D6-13/J6      | 1 (3%)  | VK1-6/J1          | 1 (4%)  |
|       |                 | VH3-30/D3-16/J4      | 1 (3%)  | VK1-8/J1          | 1 (4%)  |
|       |                 | VH4-4/D5-18/J4       | 1 (3%)  | VK1-8/J2          | 1 (4%)  |
|       |                 | VH4-31/D2-21/J6      | 1 (3%)  | VK1-9/J2          | 1 (4%)  |
|       |                 | VH4-31/D3-9/J5       | 1 (3%)  | VK1-17/J1         | 1 (4%)  |
|       |                 | VH1-2/D5-18/J5       | 1 (3%)  | VK1-17/J4         | 1 (4%)  |
|       |                 | VH1-69/D3-10/J4      | 1 (3%)  | VK1-27/J1         | 1 (4%)  |
|       |                 | VH3-15/D5-24/J4      | 1 (3%)  | VK1-39/J1         | 1 (4%)  |
|       |                 | VH3-23/D2-15/J4      | 1 (3%)  | VK1-39/J5         | 1 (4%)  |
|       |                 | VH3-33/D1-26/J4      | 1 (3%)  | VK2-30/J1         | 1 (4%)  |
|       |                 | VH3-53/D6-13/J4      | 1 (3%)  | VK3-20/J4         | 1 (4%)  |
|       |                 | VH3-48/D3-10/J4      | 1 (3%)  | VK3-20/J5         | 1 (4%)  |
|       | VH4-31/D1-1/J4  | 1 (3%)               |         |                   |         |
|       | VH4-31/D3-22/J5 | 1 (3%)               |         |                   |         |
|       | VH4-61/D5-24/J5 | 1 (3%)               |         |                   |         |
|       | VH4-28/D5-24/J4 | 1 (3%)               |         |                   |         |
|       |                 | <b>IgG (n=33)</b>    |         | <b>Igκ (n=35)</b> |         |
| BC    |                 | VH2-26/D6-19/J4      | 4 (12%) | VK3-15/J1         | 6 (17%) |
|       |                 | VH2-70/D3-10/J4      | 3 (9%)  | VK1-5/J1          | 4 (11%) |
|       |                 | VH2-26/D5-24/J3      | 2 (6%)  | VK3-15/J2         | 4 (11%) |
|       |                 | VH2-26/D2-8/J4       | 2 (6%)  | VK1-5/J2          | 2 (6%)  |
|       |                 | VH2-70/D6-19/J4      | 2 (6%)  | VK1-5/J4          | 2 (6%)  |
|       |                 | VH2-5/D1-26/J4       | 1 (3%)  | VK1-9/J4          | 2 (6%)  |
|       |                 | VH2-5/D3-16/J4       | 1 (3%)  | VK4-1/J1          | 2 (6%)  |
|       |                 | VH2-5/D3-22/J6       | 1 (3%)  | VK4-1/J4          | 2 (6%)  |
|       |                 | VH2-26/D3-9/J4       | 1 (3%)  | VK1-9/J1          | 1 (3%)  |
|       |                 | VH2-70/D1-7/J4       | 1 (3%)  | VK1D-17/J2        | 1 (3%)  |
|       |                 | VH2-70/D2-2/J4       | 1 (3%)  | VK1-33/J4         | 1 (3%)  |
|       |                 | VH2-70/D1-26/J4      | 1 (3%)  | VK1-37/J2         | 1 (3%)  |
|       |                 | VH2-70/D4-17/J4      | 1 (3%)  | VK1-39/J4         | 1 (3%)  |
|       |                 | VH3-15/D5-24/J4      | 1 (3%)  | VK2-24/J2         | 1 (3%)  |
|       |                 | VH3-21/D2-21/J3      | 1 (3%)  | VK2-28/J4         | 1 (3%)  |
|       |                 | VH3-23/D3-22/J4      | 1 (3%)  | VK2-30/J1         | 1 (3%)  |
|       |                 | VH3-23/D2-2 inv./J4  | 1 (3%)  | VK3-15/J3         | 1 (3%)  |
|       |                 | VH3-23/D6-19 inv./J4 | 1 (3%)  | VK3-20/J2         | 1 (3%)  |
|       |                 | VH3-23/D3-3/J4       | 1 (3%)  | VK4-1/J3          | 1 (3%)  |
|       |                 | VH3-30/D6-19/J4      | 1 (3%)  |                   |         |
|       |                 | VH3-30/D3-10/J6      | 1 (3%)  |                   |         |
|       |                 | VH4-4/D1-26/J4       | 1 (3%)  |                   |         |
|       |                 | VH4-31/D3-3/J2       | 1 (3%)  |                   |         |
|       |                 | VH4-59/D5-18/J2      | 1 (3%)  |                   |         |
|       |                 | VH5-51/D4-17/J4      | 1 (3%)  |                   |         |
