# Supplementary material for: Expression of combinatorial immunoglobulins in macrophages in the tumor microenvironment
Source: PubMed Central journal article supplement (PMC6150476; doi:10.1371/journal.pone.0204108), 2018-09-21
Supplement: pone.0204108.s015.pdf [file pone.0204108.s015.pdf]

Table S4: Shared V(D)J recombinations among different repertoires and cell types. Only functional recombinations are shown.

|                                            | TAM-1 |     | TAM-2 |     | TAM-3 | BCI-1 | BCI-2 | BCI-3 | BC  |
|--------------------------------------------|-------|-----|-------|-----|-------|-------|-------|-------|-----|
|                                            | IgM   | IgG | IgM   | IgG | IgM   | IgG   | IgG   | IgG   | IgG |
| V <sub>H</sub> 1-69/D3-10/J <sub>H</sub> 4 | 2     |     |       |     |       | 1     |       |       |     |
| V <sub>H</sub> 2-70/D2-2/J <sub>H</sub> 4  | 26    |     |       |     |       | 1     |       |       |     |
| V <sub>H</sub> 3-15/D5-24/J <sub>H</sub> 4 |       |     |       |     |       | 1     |       |       |     |
| V <sub>H</sub> 3-21/D3-9/J <sub>H</sub> 4  |       |     | 39    |     | 39    | 1     |       |       |     |
| V <sub>H</sub> 3-30/D6-19/J <sub>H</sub> 4 |       |     |       |     |       | 1     |       |       |     |
| V <sub>H</sub> 4-31/D3-22/J <sub>H</sub> 5 |       |     |       |     |       | 1     |       | 1     |     |
| V <sub>H</sub> 4-4/D1-26/J <sub>H</sub> 4  | 1     | 7   |       |     |       |       |       | 1     |     |

|                                      | TAM-1 | TAM-2 | TAM-3 | BCI-1 | BCI-2 | BCI-3 | BC |
|--------------------------------------|-------|-------|-------|-------|-------|-------|----|
|                                      | Igk   |       |       |       |       |       |    |
| V <sub>K</sub> 1-16/J <sub>K</sub> 1 | 2     |       |       | 1     |       |       |    |
| V <sub>K</sub> 1-33/J <sub>K</sub> 2 |       | 5     | 5     | 3     |       |       |    |
| V <sub>K</sub> 1-33/J <sub>K</sub> 4 |       | 6     | 6     | 2     | 1     | 1     |    |
| V <sub>K</sub> 1-39/J <sub>K</sub> 1 |       |       |       | 4     | 3     | 1     |    |
| V <sub>K</sub> 1-39/J <sub>K</sub> 2 |       |       |       | 3     | 1     | 3     |    |
| V <sub>K</sub> 1-39/J <sub>K</sub> 4 |       |       |       | 3     | 2     | 3     | 1  |
| V <sub>K</sub> 1-39/J <sub>K</sub> 5 |       |       |       | 1     |       | 1     |    |
| V <sub>K</sub> 1-5/J <sub>K</sub> 1  |       |       |       | 2     | 4     | 4     |    |
| V <sub>K</sub> 1-5/J <sub>K</sub> 2  |       | 6     | 5     | 2     |       | 2     |    |
| V <sub>K</sub> 1-5/J <sub>K</sub> 4  | 9     | 19    |       | 1     | 3     |       | 2  |
| V <sub>K</sub> 1-9/J <sub>K</sub> 2  |       |       |       | 1     | 1     |       |    |
| V <sub>K</sub> 1-9/J <sub>K</sub> 4  |       |       |       | 1     |       | 2     |    |
| V <sub>K</sub> 2-30/J <sub>K</sub> 1 |       |       |       | 1     |       |       | 1  |
| V <sub>K</sub> 3-20/J <sub>K</sub> 1 |       | 3     | 1     |       | 1     |       |    |
| V <sub>K</sub> 3-20/J <sub>K</sub> 2 |       | 4     |       |       | 1     | 1     |    |
| V <sub>K</sub> 3-20/J <sub>K</sub> 4 | 4     |       |       |       | 5     | 2     | 1  |
| V <sub>K</sub> 3-20/J <sub>K</sub> 5 |       |       |       | 1     | 1     |       |    |
| V <sub>K</sub> 4-1/J <sub>K</sub> 1  |       |       |       | 2     |       | 2     |    |
| V <sub>K</sub> 4-1/J <sub>K</sub> 4  |       |       |       | 2     |       |       | 2  |
