# Supplementary material for: Expression of combinatorial immunoglobulins in macrophages in the tumor microenvironment
Source: PubMed Central journal article supplement (PMC6150476; doi:10.1371/journal.pone.0204108), 2018-09-21
Supplement: pone.0204108.s016.pdf [file pone.0204108.s016.pdf]

Table S5: CDR3 sequences and the underlying VJ recombinations found in the NGS-sequenced samples TAM-4 and TAM-5.

|                 | CDR3               | IGHV        | IGHJ   | n   |
|-----------------|--------------------|-------------|--------|-----|
| TAM-4           | VKDLVTSGAGWGDC     | hIGHV3-23   | hIGHJ4 | 712 |
|                 | ARYFDTRGHPLDF      | hIGHV3-7    | hIGHJ4 | 281 |
|                 | ARYFDTRGHPLDF      | hIGHV3-66   | hIGHJ4 | 220 |
|                 | ARDYQQLGRGEDA      | hIGHV4-61   | hIGHJ6 | 147 |
|                 | ARYFDTRGHPLDF      | hIGHV3-33   | hIGHJ4 | 106 |
|                 | ARDGSGSYNWFD       | hIGHV3-7    | hIGHJ5 | 95  |
|                 | ARDYQQLGRGEDV      | hIGHV4-61   | hIGHJ6 | 83  |
|                 | ARVASGSSTVQWDY     | hIGHV4-61   | hIGHJ4 | 80  |
|                 | ARDGSGSYNWFD       | hIGHV3-66   | hIGHJ5 | 69  |
|                 | ARDRDFWGSVNYFDY    | hIGHV1-18   | hIGHJ4 | 48  |
|                 | ARYFDTRGHPLDF      | hIGHV3-74   | hIGHJ4 | 41  |
|                 | ARDGSGSYNWFD       | hIGHV3-33   | hIGHJ5 | 33  |
|                 | ARDGSGSYNWFD       | hIGHV3-74   | hIGHJ5 | 16  |
|                 | ARDRDFWGSVNYFDY    | hIGHV1-46   | hIGHJ4 | 8   |
|                 | ARYFDTRGHPLDF      | hIGHV3-64   | hIGHJ4 | 8   |
|                 | AREWGSGLTLSWSFDL   | hIGHV3-66   | hIGHJ2 | 8   |
|                 | AKDISPHYDSSDLQH    | hIGHV3-9    | hIGHJ1 | 8   |
|                 | ARDRDFWGSVNYFDY    | hIGHV1-69   | hIGHJ4 | 7   |
|                 | VKDLVAVSAGAGWGDC   | hIGHV3-23   | hIGHJ4 | 7   |
|                 | AKPRAGGDYAFDI      | hIGHV3-23   | hIGHJ3 | 7   |
|                 | AREWGSGLTLSWSFDL   | hIGHV3-7    | hIGHJ2 | 7   |
|                 | AKEDTVRISHWYFDL    | hIGHV3-30-3 | hIGHJ2 | 6   |
|                 | VKDLVTSGAGWGDC     | hIGHV3-64   | hIGHJ4 | 5   |
|                 | ARLPEDTGRALDY      | hIGHV3-11   | hIGHJ4 | 4   |
|                 | AKDPDSSGWINWYFDL   | hIGHV3-23   | hIGHJ2 | 4   |
|                 | AKTNTLMTIWGSYDY    | hIGHV3-30-3 | hIGHJ4 | 4   |
|                 | VKDVPVTSVAGAGWGDC  | hIGHV3-23   | hIGHJ4 | 3   |
|                 | VKDLVTSGAGWGDR     | hIGHV3-23   | hIGHJ5 | 3   |
|                 | AREWGSGLTLSWSFDL   | hIGHV3-33   | hIGHJ2 | 3   |
|                 | ARDCSPDLGDMYYDALDI | hIGHV3-48   | hIGHJ3 | 3   |
|                 | ARYFDTRGHPLGF      | hIGHV3-66   | hIGHJ5 | 3   |
|                 | AKTNTLMTIWGSYDY    | hIGHV3-66   | hIGHJ4 | 3   |
|                 | TTILRYFDWLLHFDY    | hIGHV3-15   | hIGHJ4 | 2   |
|                 | VKGVLTSGAGWGDC     | hIGHV3-23   | hIGHJ4 | 2   |
|                 | VKDLVTSGARWGDC     | hIGHV3-23   | hIGHJ4 | 2   |
|                 | VKDLVTSGAGWGDC     | hIGHV3-23   | hIGHJ5 | 2   |
|                 | VKDALTSGAGWGDC     | hIGHV3-23   | hIGHJ4 | 2   |
|                 | AKGRNFGVIAFDY      | hIGHV3-23   | hIGHJ4 | 2   |
|                 | AKDRGGGQWLDDALDY   | hIGHV3-23   | hIGHJ4 | 2   |
|                 | ARYFNTRGHPLDF      | hIGHV3-33   | hIGHJ4 | 2   |
|                 | ARYFDTRGHPLDF      | hIGHV3-53   | hIGHJ4 | 2   |
|                 | ARDCSPDLGDMYYDALDI | hIGHV3-53   | hIGHJ3 | 2   |
| ARDRDFWGSVNYFDY | hIGHV3-64          | hIGHJ4      | 2      |     |
| ARYLDTRGHPLDF   | hIGHV3-66          | hIGHJ4      | 2      |     |
| AKEDTVRISHWYFDL | hIGHV3-66          | hIGHJ2      | 2      |     |
| ARYLDTRGHPLDF   | hIGHV3-7           | hIGHJ4      | 2      |     |
| ARYFGTRGHPLDF   | hIGHV3-7           | hIGHJ4      | 2      |     |
| ARDYQQPRGEDA    | hIGHV4-61          | hIGHJ6      | 2      |     |
| ARAGDYGEYFDY    | hIGHV4-61          | hIGHJ4      | 2      |     |
| ATTSSLYYGMVDV   | hIGHV6-1           | hIGHJ6      | 2      |     |

|                  | CDR3                | IGHV      | IGHJ   | n    |
|------------------|---------------------|-----------|--------|------|
| TAM-5            | ARRYYYASIGHYSYDL    | hIGHV5-51 | hIGHJ5 | 2982 |
|                  | ARRYYYASIGHYSYDL    | hIGHV5-a  | hIGHJ5 | 875  |
|                  | AIYPWYYCSINTCPLAFDP | hIGHV3-48 | hIGHJ5 | 46   |
|                  | ARRYYYASIGHYSYGL    | hIGHV5-51 | hIGHJ5 | 18   |
|                  | ARRYYYASIGHYSYDL    | hIGHV5-51 | hIGHJ5 | 17   |
|                  | ARRYYYASIGHYPYDL    | hIGHV5-51 | hIGHJ5 | 16   |
|                  | AIYPWYYCSINTCPLAFDP | hIGHV3-66 | hIGHJ5 | 13   |
|                  | AGRYYYASIGHYSYDL    | hIGHV5-a  | hIGHJ5 | 12   |
|                  | ARRCYASIGHYSYDL     | hIGHV5-51 | hIGHJ5 | 11   |
|                  | ARRYYYAGIGHYSYDL    | hIGHV5-51 | hIGHJ5 | 9    |
|                  | ARRCYASIGHYSYDL     | hIGHV5-51 | hIGHJ5 | 7    |
|                  | ARRYYYASIGHYSYGL    | hIGHV5-a  | hIGHJ5 | 7    |
|                  | ARRHYASIGHYSYDL     | hIGHV5-51 | hIGHJ5 | 6    |
|                  | ARRYYHASIGHYSYDL    | hIGHV5-51 | hIGHJ5 | 6    |
|                  | ARRYYYASIGHYSYDL    | hIGHV5-51 | hIGHJ5 | 5    |
|                  | ARRYYASIGHYSYDL     | hIGHV5-51 | hIGHJ5 | 5    |
|                  | ARRYYYASTGHYSYDL    | hIGHV5-51 | hIGHJ5 | 5    |
|                  | ARRYYYAGIGHYSYDL    | hIGHV5-a  | hIGHJ5 | 4    |
|                  | ARRYYYASIGHYSHDL    | hIGHV5-51 | hIGHJ5 | 4    |
|                  | ARRYYYARIGHYSYDL    | hIGHV5-51 | hIGHJ5 | 3    |
|                  | ARRYYYASIGHYPYDL    | hIGHV5-a  | hIGHJ5 | 3    |
|                  | ARRYYYASIGHYSCDL    | hIGHV5-51 | hIGHJ5 | 3    |
|                  | ARRYYYASIGRYSYDL    | hIGHV5-51 | hIGHJ5 | 3    |
|                  | ARRYYYASIGYYSYDL    | hIGHV5-a  | hIGHJ5 | 3    |
|                  | ARRYYYASVGHYSYDL    | hIGHV5-51 | hIGHJ5 | 3    |
|                  | ARRYYYVSIGHYSYDL    | hIGHV5-51 | hIGHJ5 | 3    |
|                  | AIYPWYYCSINTCPLAFDP | hIGHV3-64 | hIGHJ5 | 2    |
|                  | AKRYYYASIGHYSYDL    | hIGHV5-a  | hIGHJ5 | 2    |
|                  | ARRYYYASIGHYSHDL    | hIGHV5-a  | hIGHJ5 | 2    |
|                  | ARRYYYASIGHYSYDL    | hIGHV5-51 | hIGHJ5 | 2    |
|                  | ARRYYYASIGHYSYGL    | hIGHV5-51 | hIGHJ5 | 2    |
|                  | ARRYYYASIGYYSYDL    | hIGHV5-51 | hIGHJ5 | 2    |
|                  | ARRYYYASISHYSYDL    | hIGHV5-51 | hIGHJ5 | 2    |
| ARRYYYASNGHYSYDL | hIGHV5-51           | hIGHJ5    | 2      |      |
| ARRYYYVSIGHYSYDL | hIGHV5-a            | hIGHJ5    | 2      |      |
| TRRYYYASIGHYSYDL | hIGHV5-51           | hIGHJ5    | 2      |      |
| VRRYYYASIGHYSYDL | hIGHV5-51           | hIGHJ5    | 2      |      |
