# Supplementary material for: Expression of combinatorial immunoglobulins in macrophages in the tumor microenvironment
Source: PubMed Central journal article supplement (PMC6150476; doi:10.1371/journal.pone.0204108), 2018-09-21
Supplement: pone.0204108.s017.pdf [file pone.0204108.s017.pdf]

**Table S6: number of detected heavy and light chain sequences in single TAM isolated from different tumor samples**

| <b>Patient</b> | <b>TAM isolated from</b> | <b>number of analyzed cells</b> | <b>number of detected heavy chains</b> | <b>number of detected light chains</b> |
|----------------|--------------------------|---------------------------------|----------------------------------------|----------------------------------------|
| <b>TAM-6</b>   | liver ca                 | 25                              | 7                                      | 0                                      |
| <b>TAM-7</b>   | colon ca                 | 17                              | 0                                      | 0                                      |
| <b>TAM-8</b>   | lymphoma                 | 17                              | 0                                      | 0                                      |
| <b>TAM-9</b>   | colon ca                 | 29                              | 1                                      | 2                                      |
| <b>TAM-10</b>  | glioblastoma             | 14                              | 0                                      | 0                                      |
